# Supplementary material
Source: Royal Society of Chemistry journal article supplement (doi:10.1039/d6ta00742b)
Supplement: d6ta00742b1.pdf [file d6ta00742b1.pdf]

Electronic Supporting Information

**Amplified Excited State Diverse Effects Arising from Ligand Regioisomerism  
in Cu(I) Complexes for Advanced Applications**

*Cecilia Bruschi,<sup>1</sup> † Dominik Graf,<sup>2</sup> Olaf Fuhr,<sup>2,3</sup> Valerio Cuboni,<sup>4</sup> Raffaella Lettieri,<sup>4</sup> Emanuela Gatto,<sup>4</sup> Sergei Lebedkin,<sup>2</sup> Angela Bihlmeier,<sup>\*5</sup> Claudia Bizzarri<sup>\*1,4</sup>*

<sup>1</sup>*Institute of Organic Chemistry (IOC), Karlsruhe Institute of Technology (KIT),  
Fritz-Haber-Weg 6, 76131 Karlsruhe, Germany*

<sup>2</sup>*Institute of Nanotechnology (INT), Karlsruhe Institute of Technology (KIT),  
Hermann-von-Helmholtz-Platz 1, 76344 Eggenstein-Leopoldshafen, Germany*

<sup>3</sup>*Karlsruhe Nano Micro Facility (KNMFi), Karlsruhe Institute of Technology (KIT),  
Hermann-von-Helmholtz-Platz 1, 76344 Eggenstein-Leopoldshafen, Germany*

<sup>4</sup>*Department of Chemical Sciences and Technologies, University of Rome Tor Vergata,  
via della Ricerca Scientifica, 00133 Rome, Italy*

<sup>5</sup>*Institute of Physical Chemistry (IPC), Karlsruhe Institute of Technology (KIT),  
Fritz-Haber-Weg 2, 76131 Karlsruhe, Germany*

**Table of Contents**

|                                               |    |
|-----------------------------------------------|----|
| 1. Synthetic procedures .....                 | 2  |
| 2. NMR data .....                             | 3  |
| 3. Single crystal X-ray analysis.....         | 7  |
| 4. Stability tests of the complexes.....      | 11 |
| 5. Additional photophysical data .....        | 13 |
| 6. Additional quantum-chemical data .....     | 17 |
| 7. Electrochemical data of the ligands .....  | 24 |
| 8. Additional photocurrent measurements ..... | 25 |
| 9. References .....                           | 26 |

## 1. Synthetic procedures

**3-((triisopropylsilyl)ethynyl)quinoxalin-2(1H)-one (2).** 1,2-Phenylendiamine (0.440 g, 4.07 mmol, 1.00 equiv.) was reacted with methyl 2-oxo-4-(triisopropylsilyl)but-3-ynoate (**1**) (1.42 g, 5.29 mmol, 1.50 equiv.) into a 100 mL solution of ethanol and acetic acid (7:3) at 80°C for 15 h. After this time, the reaction mixture was quenched with water. The organic product was extracted three times with DCM. The combined organic phases were washed with water (three times), brine and then dried over Na<sub>2</sub>SO<sub>4</sub> and filtered. The solvent was reduced under vacuum. The product was obtained without the need of a purification as a light-yellow powder. (1.14 g, 3.50 mmol) Yield: 86%. <sup>1</sup>H NMR (400 MHz, CDCl<sub>3</sub>) δ = 12.91 (s, 1H, H<sub>aromatic</sub>), 7.91 – 7.85 (m, 1H, H<sub>aromatic</sub>), 7.52 (td, *J* = 7.8, 1.4 Hz, 1H, H<sub>aromatic</sub>), 7.36 (t, *J* = 7.5 Hz, 2H, H<sub>aromatic</sub>), 1.23 (m, *J* = 4.2 Hz, 21H, H<sub>isopropyl</sub>) ppm. <sup>13</sup>C NMR (101 MHz, CDCl<sub>3</sub>) δ = 156.54, 133.37, 131.39, 131.12, 129.56, 124.74, 115.99, 102.61, 101.97, 18.83, 11.46 ppm. HRMS (ESI) *m/z* (C<sub>19</sub>H<sub>26</sub>N<sub>2</sub>OSi): 327.1892 (calc.), 327.1883 (found).

## 1-ethyl-3-((triisopropylsilyl)ethynyl)quinoxalin-2(1H)-one (3k) and 2-ethoxy-3-((triisopropylsilyl)ethynyl)quinoxaline (3e)

((Triisopropylsilyl)ethynyl)quinoxalin-2(1H)-one (**2**) (1.130 g, 3.46 mmol, 1.00 equiv.) and K<sub>2</sub>CO<sub>3</sub> (1.190 g, 8.65 mmol, 2.50 equiv.) were dissolved in anhydrous DMF (5 mL). After 30 minutes, iodoethane (0.69 mL, 1.34 g, 8.65 mmol, 2.50 equiv.) was added and the reaction was left under stirring at 50°C for two hours. After this period time, water was added. The organic product was then extracted with DCM (three times), washed with water and brine, dried over Na<sub>2</sub>SO<sub>4</sub> and filtered. The solvent was removed under vacuum. Two products were obtained **3k** and **3e** and purified by a silica gel column chromatography using Cyclohexane/DCM (30:70) as eluent. The main product (**3k**), bearing the ethyl group attached to the nitrogen atom, was obtained as a light-yellow solid with a yield of 54% (0.660 g, 1.86 mmol). <sup>1</sup>H NMR (400 MHz, CDCl<sub>3</sub>) δ = 7.88 (dd, *J* = 8.1, 1.6 Hz, 1H, H<sub>aromatic</sub>), 7.56 (ddd, *J* = 8.6, 7.3, 1.6 Hz, 1H, H<sub>aromatic</sub>), 7.36 – 7.29 (m, 2H, H<sub>aromatic</sub>), 4.33 (q, *J* = 7.2 Hz, 2H, CH<sub>2</sub>), 1.39 (t, *J* = 7.2 Hz, 3H, CH<sub>3</sub>), 1.23 – 1.17 (m, 21H, H<sub>isopropyl</sub>) ppm. <sup>13</sup>C NMR (101 MHz, CDCl<sub>3</sub>) δ = 154.08, 142.58, 133.61, 132.34, 131.33, 130.85, 123.84, 113.66, 102.53, 101.35, 37.81, 18.83, 12.51, 11.44 ppm. HRMS (ESI) *m/z* ([M+H]<sup>+</sup>, (C<sub>21</sub>H<sub>30</sub>N<sub>2</sub>OSi)): 355.2206 (calc.), 355.2194 (found). The other regioisomer (**3e**), with the ethyl group linked to the oxygen atom, was isolated as a white solid with a yield of 27% (0.330 g, 0.93 mmol). <sup>1</sup>H NMR (400 MHz, CDCl<sub>3</sub>) δ = 7.98 (dd, *J* = 8.2, 1.5 Hz, 1H, H<sub>aromatic</sub>), 7.77 (dd, *J* = 8.4, 1.4 Hz, 1H, H<sub>aromatic</sub>), 7.63 (ddd, *J* = 8.3, 7.0, 1.5 Hz, 1H, H<sub>aromatic</sub>), 7.53 (ddd, *J* = 8.4, 7.0, 1.5 Hz, 1H, H<sub>aromatic</sub>), 4.54 (q, *J* = 7.1 Hz, 2H, CH<sub>2</sub>), 1.48 (t, *J* = 7.1 Hz, 3H, CH<sub>3</sub>), 1.19 (m, *J* = 3.8 Hz, 21H, H<sub>isopropyl</sub>) ppm. <sup>13</sup>C NMR (101 MHz, CDCl<sub>3</sub>) δ = 157.59, 139.68, 138.52, 132.95, 130.51, 128.89, 126.94, 126.89, 101.71, 100.22, 63.08, 27.07, 18.82, 14.50, 11.43 ppm. HRMS (ESI) *m/z* ([M+H]<sup>+</sup>, (C<sub>21</sub>H<sub>30</sub>N<sub>2</sub>OSi)): 355.2206 (calc.), 355.2194 (found).

## 2. NMR data

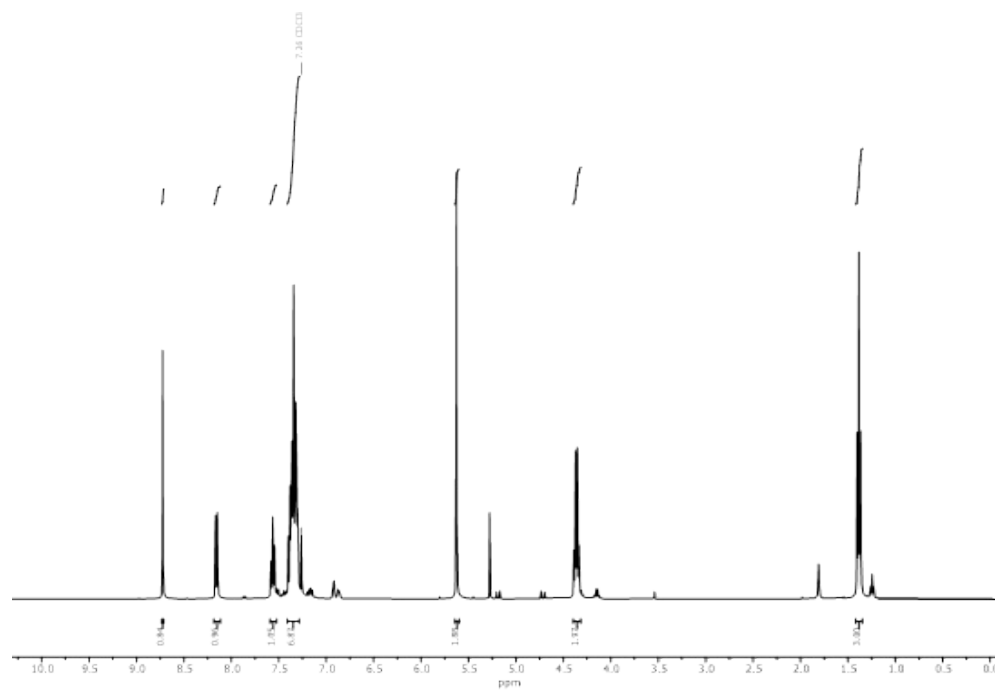

**Figure S1.** <sup>1</sup>H NMR (400 MHz, CDCl<sub>3</sub>) of ligand **4k** (3-(1-benzyl-1H-1,2,3-triazol-4-yl)-1-ethylquinoxalin-2(1H)-one).

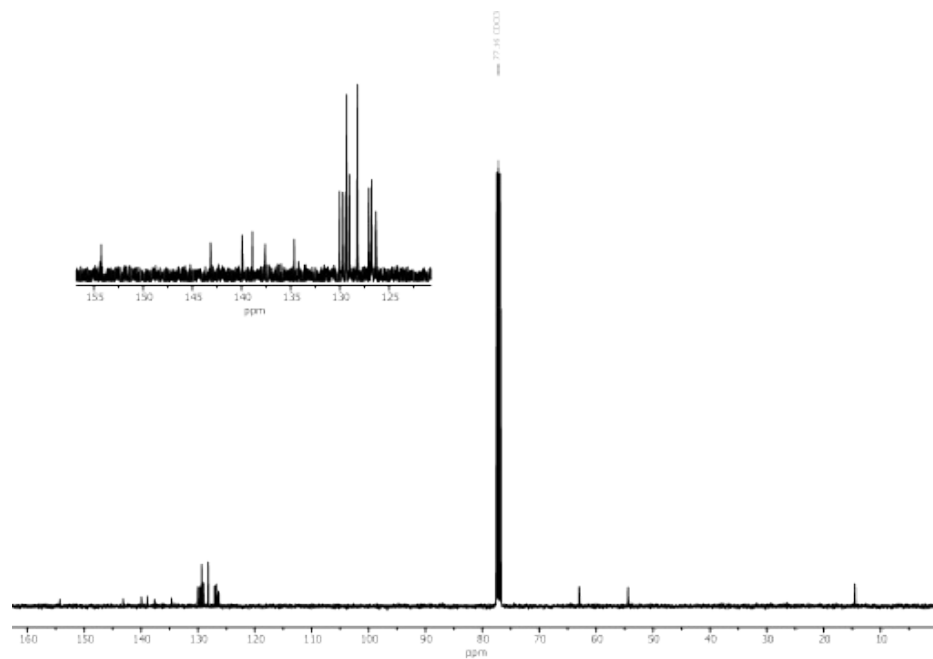

**Figure S2.** <sup>13</sup>C NMR (101 MHz, CDCl<sub>3</sub>) of ligand **4k** (3-(1-benzyl-1H-1,2,3-triazol-4-yl)-1-ethylquinoxalin-2(1H)-one).

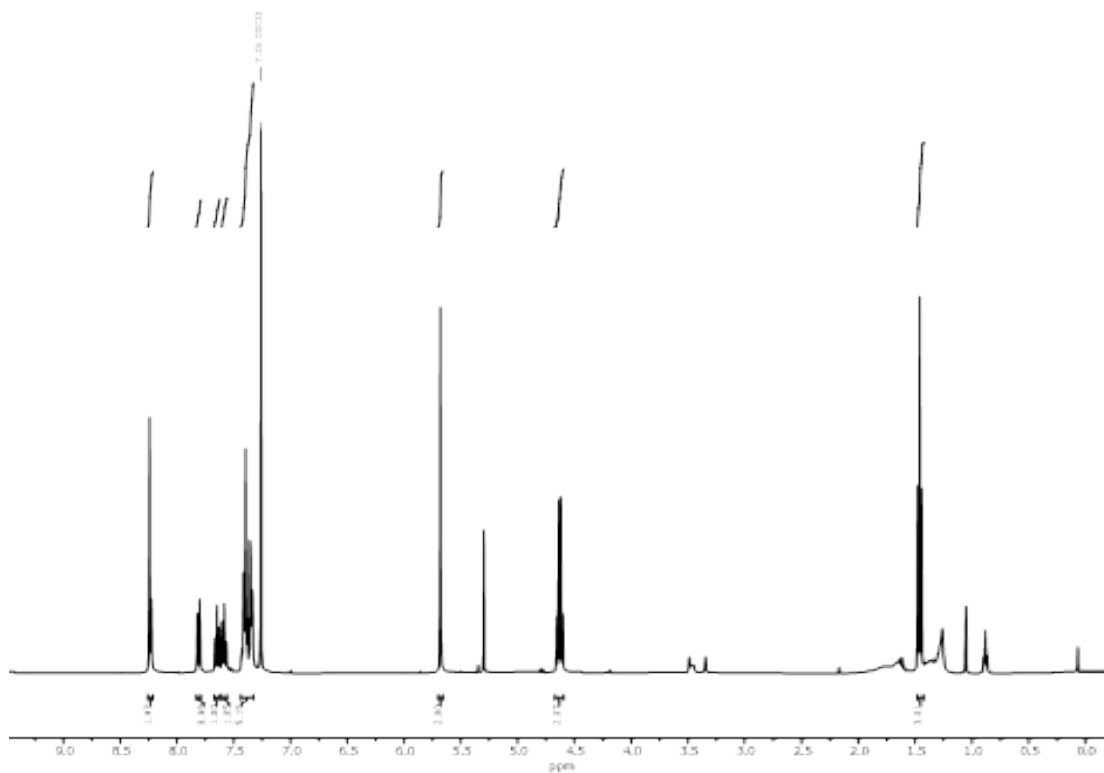

**Figure S3.**  $^1\text{H}$  NMR (400 MHz,  $\text{CDCl}_3$ ) of ligand **4e** (2-(1-benzyl-1H-1,2,3-triazol-4-yl)-3-ethoxyquinoxaline).

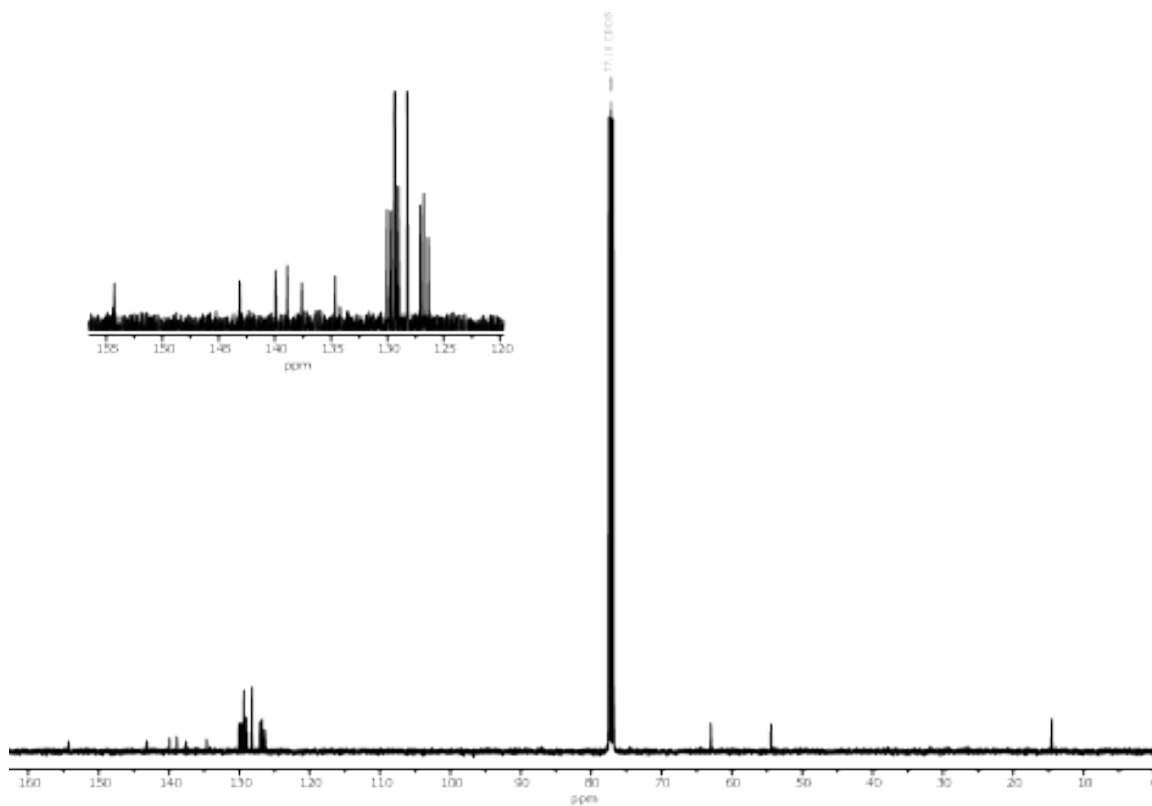

**Figure S4.**  $^{13}\text{C}$  NMR (101 MHz,  $\text{CDCl}_3$ ) of ligand **4e**, (2-(1-benzyl-1H-1,2,3-triazol-4-yl)-3-ethoxyquinoxaline).

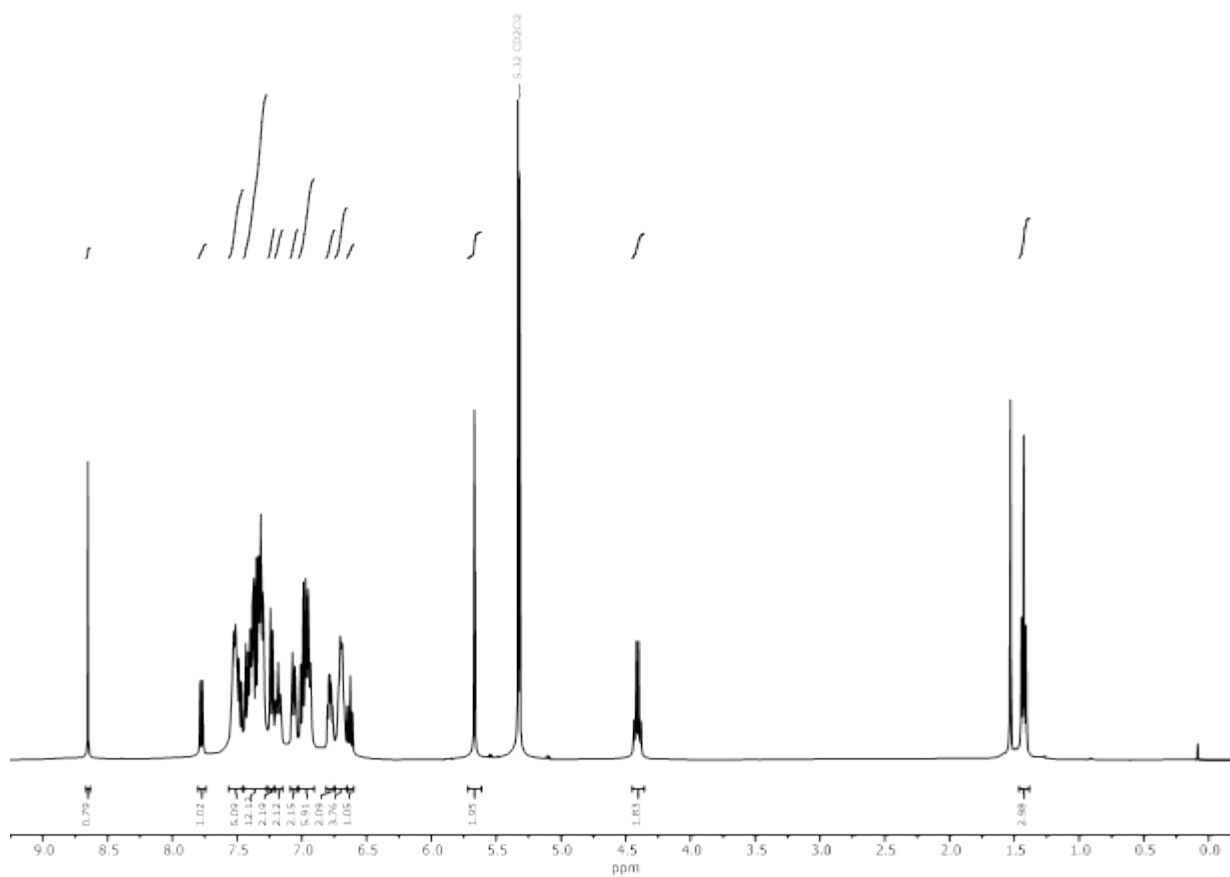

**Figure S5.**  $^1\text{H}$  NMR (400 MHz,  $\text{CDCl}_3$ ) of Cu(I) complex **5k**.

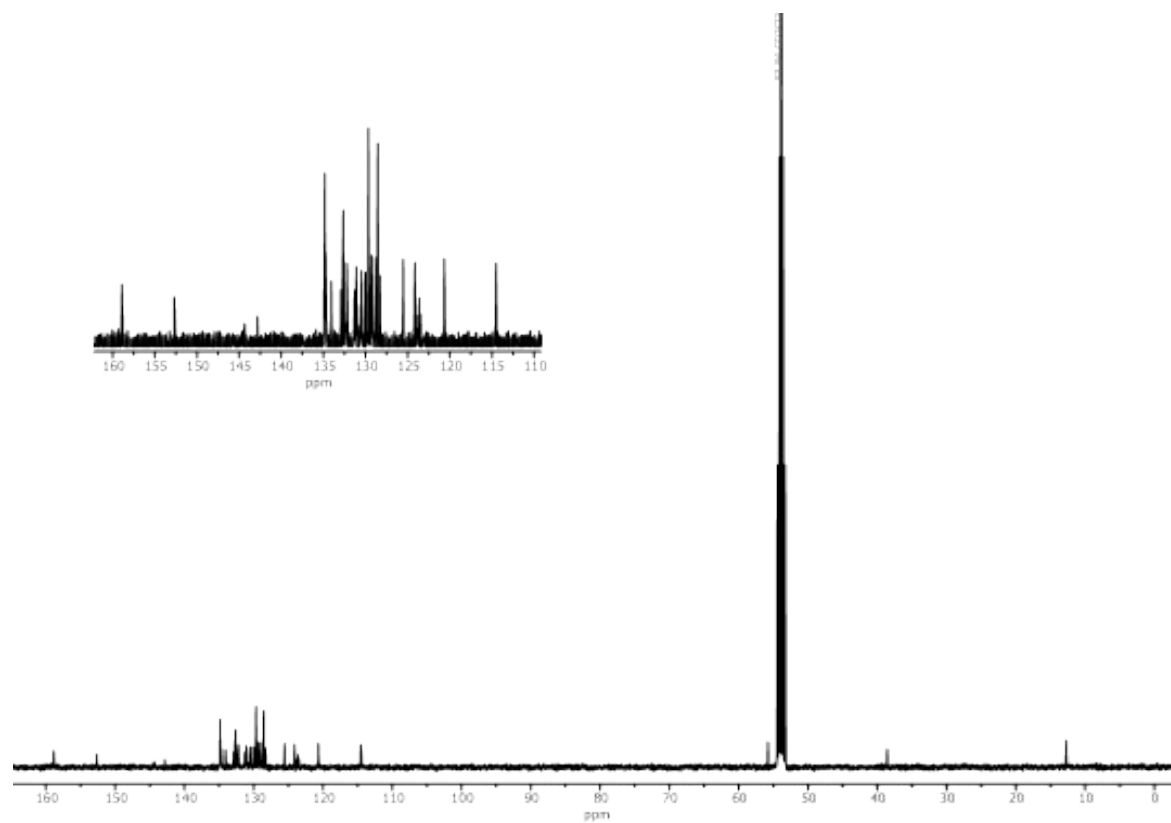

**Figure S6.**  $^{13}\text{C}$  NMR (101 MHz,  $\text{CDCl}_3$ ) of Cu(I) complex **5k**.

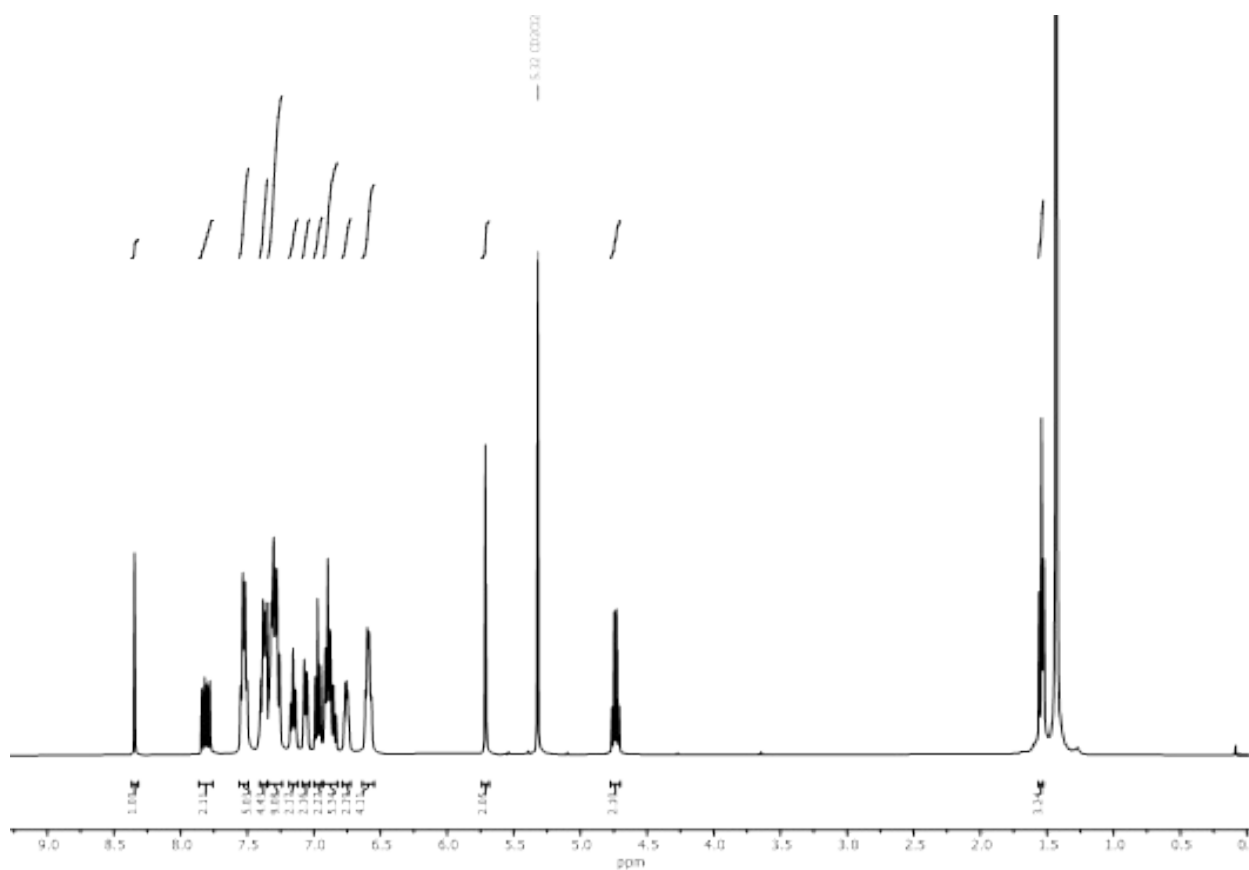

**Figure S7.**  $^1\text{H}$  NMR (400 MHz,  $\text{CDCl}_3$ ) of Cu(I) complex **5e**.

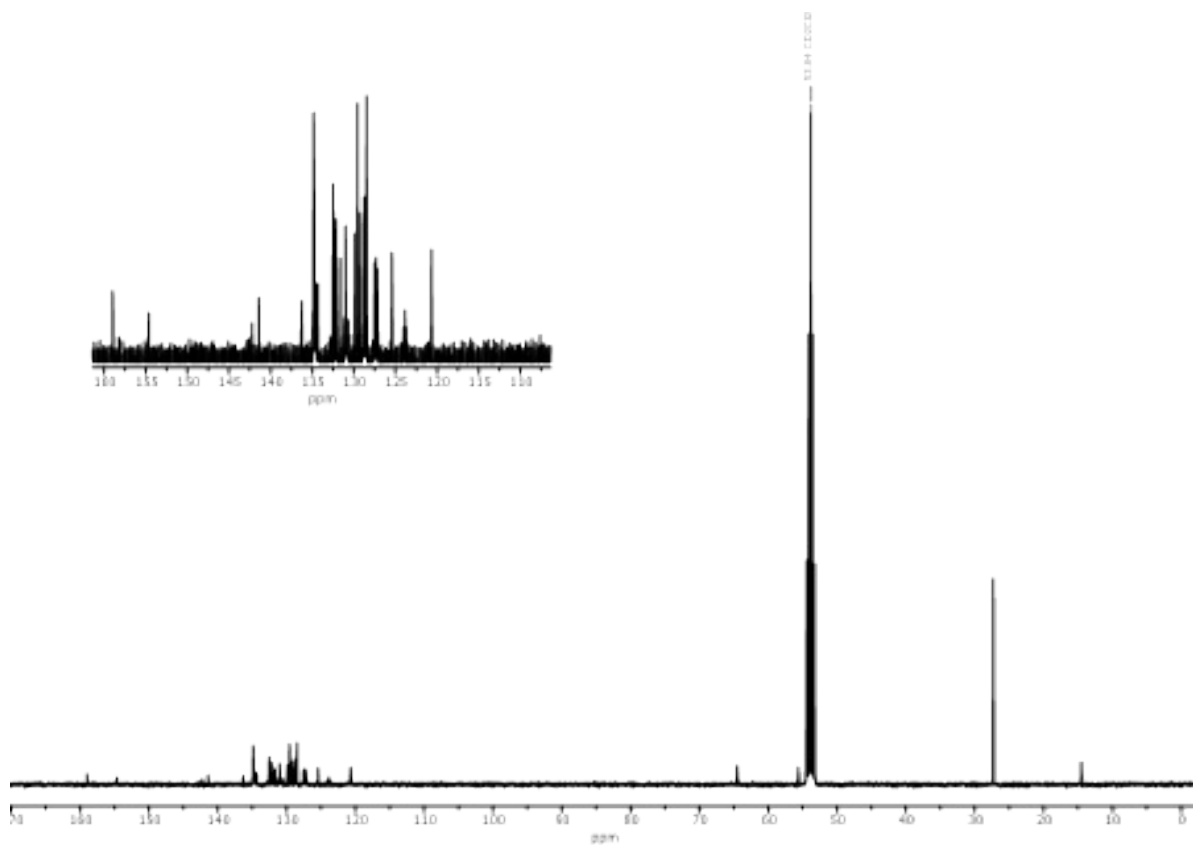

**Figure S8.**  $^{13}\text{C}$  NMR (101 MHz,  $\text{CDCl}_3$ ) of Cu(I) complex **5e**.

### 3. Single crystal X-ray analysis

Single crystal X-ray diffraction data were collected on a Stoe StadiVari diffractometer with monochromated Ga K $\alpha$  (1.34143 Å) radiation generated by an Excillum MetalJet at low temperature. Using Olex2 [1], the structures were solved with the ShelXT [2] structure solution program using Intrinsic Phasing and refined with the ShelXL [3] refinement package using Least Squares minimization. Refinement was performed with anisotropic temperature factors for all non-hydrogen atoms; hydrogen atoms were calculated on idealized positions. Crystallographic data and refinement details are summarized in Table S1.

Crystallographic data for compounds **3e**, **4e**, **5k** and **5e** reported in this paper have been deposited with the Cambridge Crystallographic Data Centre as supplementary information no. CCDC-2495572–2495575. Copies of the data can be obtained free of charge from <https://www.ccdc.cam.ac.uk/structures/>.

**Table S1.** Crystallographic data and refinement details of **3e** and **4e**.

| Compound                              | <b>3e</b>                                                       | <b>4e</b>                                        |
|---------------------------------------|-----------------------------------------------------------------|--------------------------------------------------|
| Empirical formula                     | C <sub>21</sub> H <sub>30</sub> N <sub>2</sub> O <sub>5</sub> i | C <sub>19</sub> H <sub>17</sub> N <sub>5</sub> O |
| Formula weight                        | 354.56                                                          | 331.38                                           |
| Temperature/K                         | 150                                                             | 150                                              |
| Crystal system                        | triclinic                                                       | monoclinic                                       |
| Space group                           | <i>P</i>                                                        | <i>P</i> 2 <sub>1</sub> / <i>c</i>               |
| <i>a</i> /Å                           | 8.5621(3)                                                       | 7.9579(2)                                        |
| <i>b</i> /Å                           | 11.0550(4)                                                      | 18.3644(7)                                       |
| <i>c</i> /Å                           | 12.5523(5)                                                      | 11.2638(3)                                       |
| $\alpha$ /°                           | 65.642(3)                                                       | 90                                               |
| $\beta$ /°                            | 73.994(3)                                                       | 93.225(2)                                        |
| $\gamma$ /°                           | 74.747(3)                                                       | 90                                               |
| Volume/Å <sup>3</sup>                 | 1025.16(7)                                                      | 1643.51(9)                                       |
| <i>Z</i>                              | 2                                                               | 4                                                |
| $\rho_{\text{calc}}$ /cm <sup>3</sup> | 1.149                                                           | 1.339                                            |
| $\mu$ /mm <sup>-1</sup>               | 0.697                                                           | 0.451                                            |
| <i>F</i> (000)                        | 384.0                                                           | 696.0                                            |

|                                             |                                                   |                                                   |
|---------------------------------------------|---------------------------------------------------|---------------------------------------------------|
| Crystal size/mm <sup>3</sup>                | 0.18 × 0.16 × 0.14                                | 0.21 × 0.19 × 0.17                                |
| Radiation                                   | GaKα (λ = 1.34143)                                | GaKα (λ = 1.34143)                                |
| 2θ range for data collection/°              | 6.85 to 127.872                                   | 8.02 to 124.962                                   |
| Index ranges                                | -11 ≤ h ≤ 6,<br>-14 ≤ k ≤ 14,<br>-16 ≤ l ≤ 16     | -3 ≤ h ≤ 10,<br>-24 ≤ k ≤ 24,<br>-14 ≤ l ≤ 14     |
| Reflections collected                       | 12050                                             | 28413                                             |
| Independent reflections                     | 4913 [R <sub>int</sub> = 0.0157]                  | 3957 [R <sub>int</sub> = 0.0257]                  |
| Indep. refl. with I ≥ 2σ (I)                | 4443                                              | 3293                                              |
| Data/restraints/parameters                  | 4913/0/233                                        | 3957/0/227                                        |
| Goodness-of-fit on F <sup>2</sup>           | 1.065                                             | 1.059                                             |
| Final R indexes [I ≥ 2σ (I)]                | R <sub>1</sub> = 0.0341, wR <sub>2</sub> = 0.0947 | R <sub>1</sub> = 0.0342, wR <sub>2</sub> = 0.0883 |
| Final R indexes [all data]                  | R <sub>1</sub> = 0.0372, wR <sub>2</sub> = 0.0964 | R <sub>1</sub> = 0.0429, wR <sub>2</sub> = 0.0918 |
| Largest diff. peak/hole / e Å <sup>-3</sup> | 0.27/-0.32                                        | 0.26/-0.23                                        |
| CCDC number                                 | 2495572                                           | 2495573                                           |

**Table S1 (continued).** Crystallographic data and refinement details of **5k** and **5e**.

| Compound          | <b>5k</b>                                                                                                     | <b>5e</b>                                                                                                     |
|-------------------|---------------------------------------------------------------------------------------------------------------|---------------------------------------------------------------------------------------------------------------|
| Empirical formula | C <sub>56</sub> H <sub>47</sub> Cl <sub>2</sub> CuF <sub>6</sub> N <sub>5</sub> O <sub>2</sub> P <sub>3</sub> | C <sub>58</sub> H <sub>51</sub> Cl <sub>6</sub> CuF <sub>6</sub> N <sub>5</sub> O <sub>2</sub> P <sub>3</sub> |
| Formula weight    | 1163.33                                                                                                       | 1333.19                                                                                                       |
| Temperature/K     | 150                                                                                                           | 180                                                                                                           |
| Crystal system    | monoclinic                                                                                                    | triclinic                                                                                                     |
| Space group       | <i>P</i> 2 <sub>1</sub> / <i>c</i>                                                                            | <i>P</i>                                                                                                      |
| <i>a</i> /Å       | 10.9697(2)                                                                                                    | 14.1830(3)                                                                                                    |
| <i>b</i> /Å       | 30.9030(8)                                                                                                    | 14.4936(3)                                                                                                    |
| <i>c</i> /Å       | 15.7518(4)                                                                                                    | 17.2084(4)                                                                                                    |
| α/°               | 90                                                                                                            | 71.464(2)                                                                                                     |
| β/°               | 94.550(2)                                                                                                     | 83.167(2)                                                                                                     |

|                                               |                                                                       |                                                                       |
|-----------------------------------------------|-----------------------------------------------------------------------|-----------------------------------------------------------------------|
| $\gamma/^\circ$                               | 90                                                                    | 63.560(2)                                                             |
| Volume/ $\text{\AA}^3$                        | 5323.0(2)                                                             | 3002.03(13)                                                           |
| Z                                             | 4                                                                     | 2                                                                     |
| $\rho_{\text{calc}}/\text{cm}^3$              | 1.452                                                                 | 1.475                                                                 |
| $\mu/\text{mm}^{-1}$                          | 3.759                                                                 | 4.419                                                                 |
| F(000)                                        | 2384.0                                                                | 1360.0                                                                |
| Crystal size/ $\text{mm}^3$                   | $0.18 \times 0.1 \times 0.02$                                         | $0.3 \times 0.28 \times 0.26$                                         |
| Radiation                                     | GaK $\alpha$ ( $\lambda = 1.34143$ )                                  | GaK $\alpha$ ( $\lambda = 1.34143$ )                                  |
| $2\Theta$ range for data collection/ $^\circ$ | 5.492 to 124.98                                                       | 4.714 to 128.362                                                      |
| Index ranges                                  | $-14 \leq h \leq 5,$<br>$-40 \leq k \leq 39,$<br>$-20 \leq l \leq 20$ | $-18 \leq h \leq 18,$<br>$-18 \leq k \leq 19,$<br>$-7 \leq l \leq 22$ |
| Reflections collected                         | 33930                                                                 | 36294                                                                 |
| Independent reflections                       | 12502 [ $R_{\text{int}} = 0.0254$ ]                                   | 14466 [ $R_{\text{int}} = 0.0309$ ]                                   |
| Indep. refl. with $I \geq 2\sigma(I)$         | 9511                                                                  | 11122                                                                 |
| Data/restraints/parameters                    | 12502/0/677                                                           | 14466/0/734                                                           |
| Goodness-of-fit on $F^2$                      | 1.092                                                                 | 1.037                                                                 |
| Final R indexes [ $I \geq 2\sigma(I)$ ]       | $R_1 = 0.0554, wR_2 = 0.1431$                                         | $R_1 = 0.0913, wR_2 = 0.2627$                                         |
| Final R indexes [all data]                    | $R_1 = 0.0773, wR_2 = 0.1526$                                         | $R_1 = 0.1107, wR_2 = 0.2858$                                         |
| Largest diff. peak/hole / $e \text{\AA}^{-3}$ | 1.55/−1.51                                                            | 1.00/−1.37                                                            |
| CCDC number                                   | 2495574                                                               | 2495575                                                               |

---

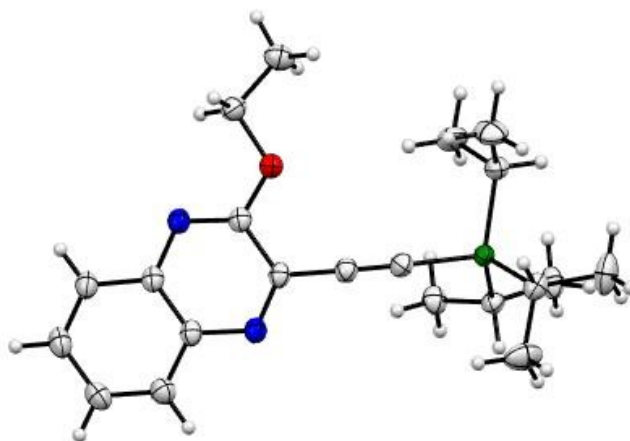

**Figure S9.** ORTEP drawing of crystal 2-ethoxy-3-((triisopropylsilyl)ethynyl)quinoxaline (**3e**).

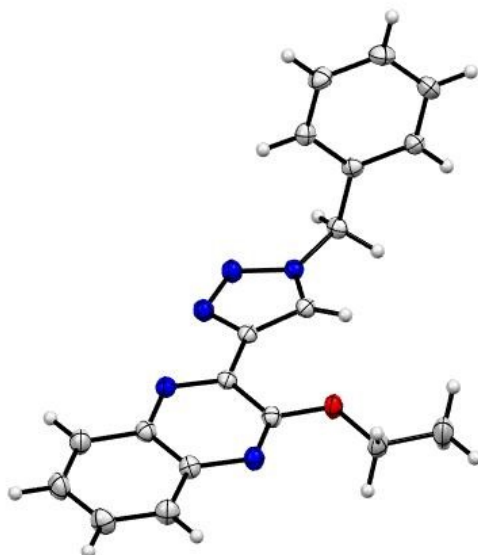

**Figure S10.** ORTEP drawing of crystal 2-(1'-benzyl-1'H-1',2',3'-triazol-4'-yl)-3-ethoxyquinoxaline (**4e**).

#### 4. Stability tests of the complexes

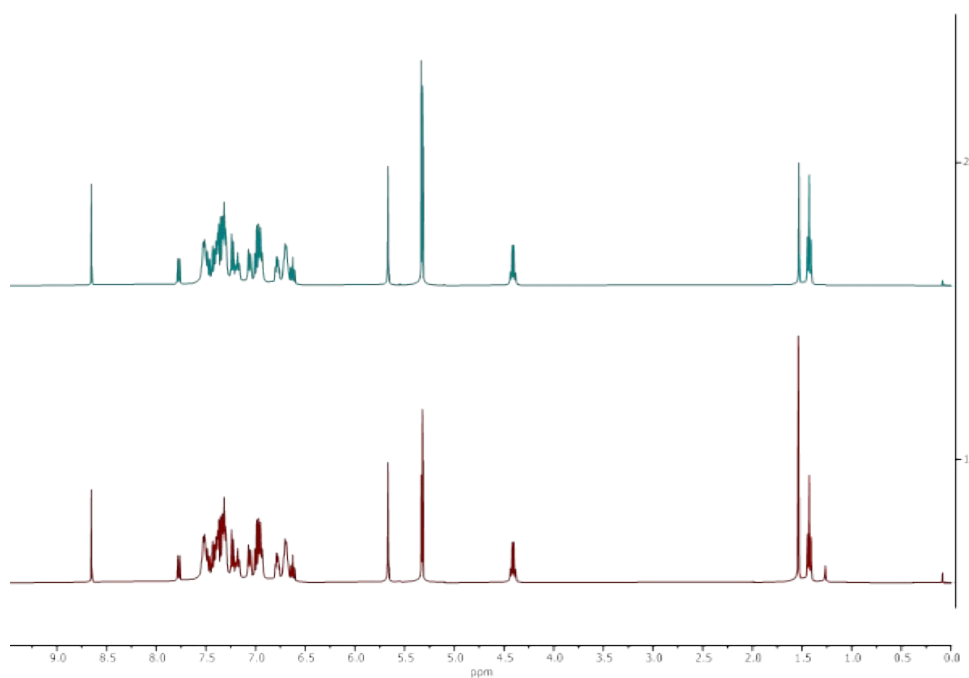

**Figure S11.**  $^1\text{H}$  NMR (400 MHz) of **5k** in  $\text{CD}_2\text{Cl}_2$ : freshly prepared solution (top) and after a week (bottom).

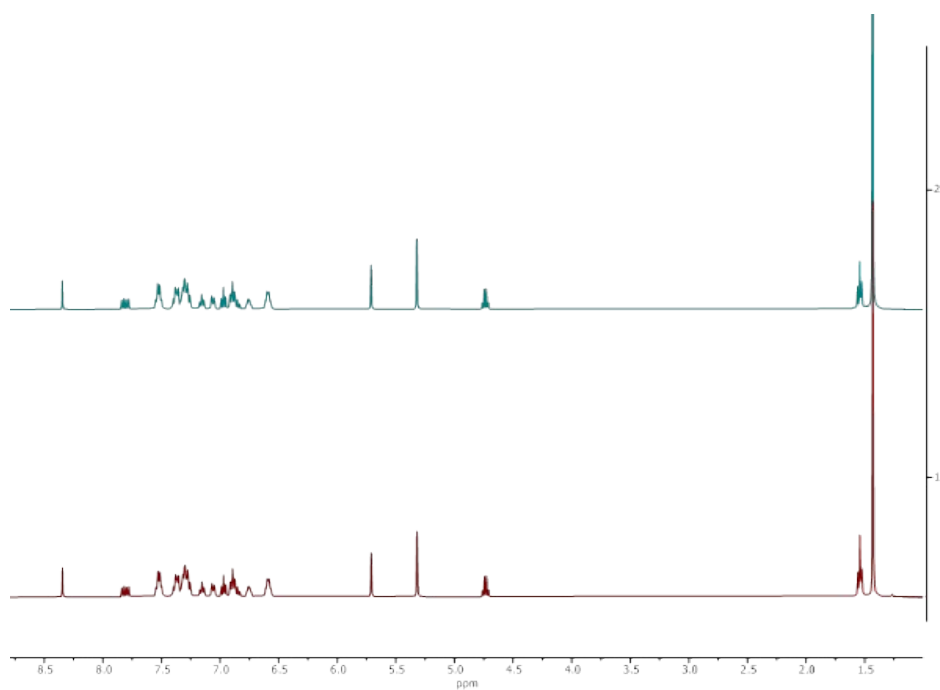

**Figure S12.**  $^1\text{H}$  NMR (400 MHz) of **5e** in  $\text{CD}_2\text{Cl}_2$ : freshly prepared solution (top) and after a week (bottom).

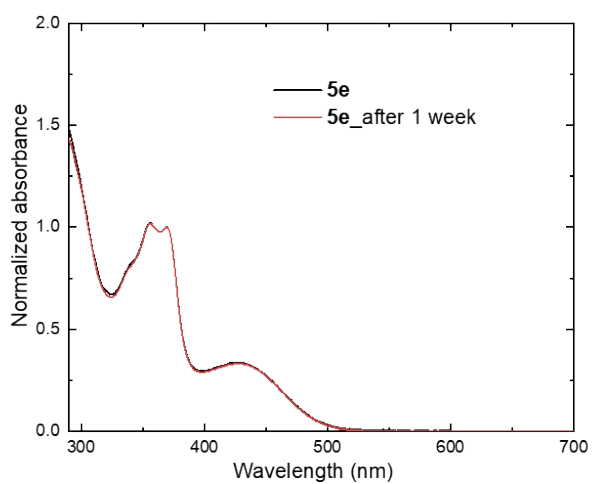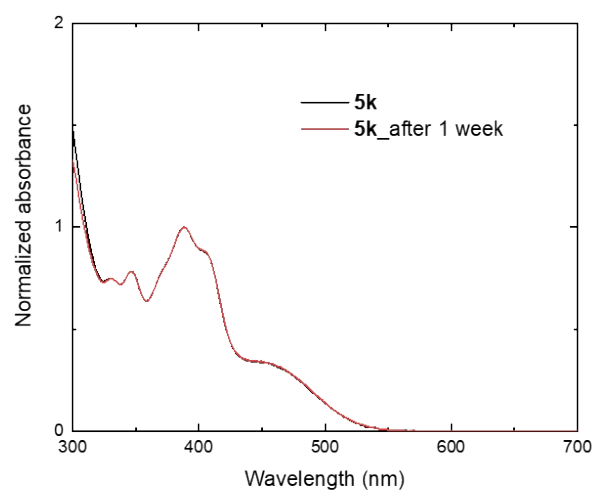

**Figure S13.** UV-vis absorption spectra of a solution of **5e** (left) and **5k** (right), freshly prepared (black curve) and after one week (red curve).

## 5. Additional photophysical data

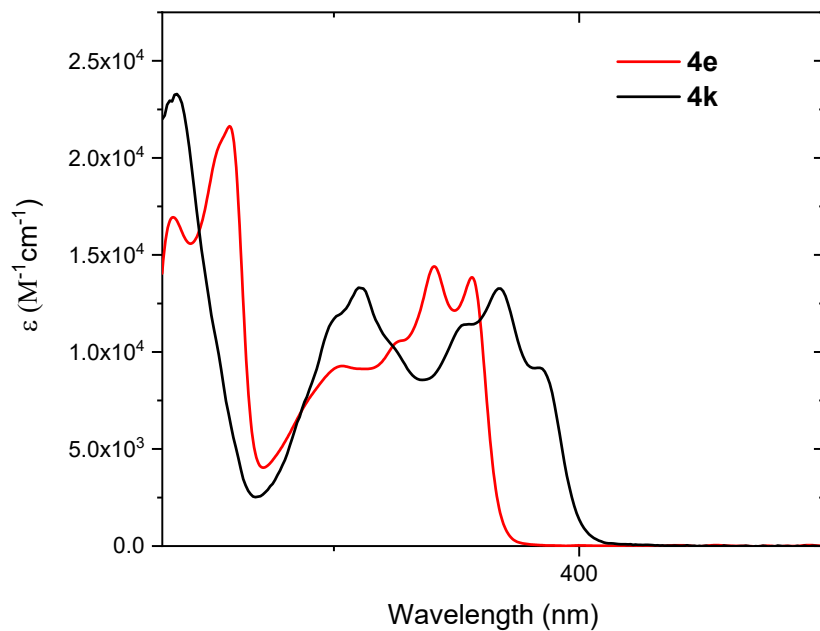

**Figure S14.** UV-vis absorption spectra of the ligands **4e** (red curve) and **4k** (black curve) in dichloromethane.

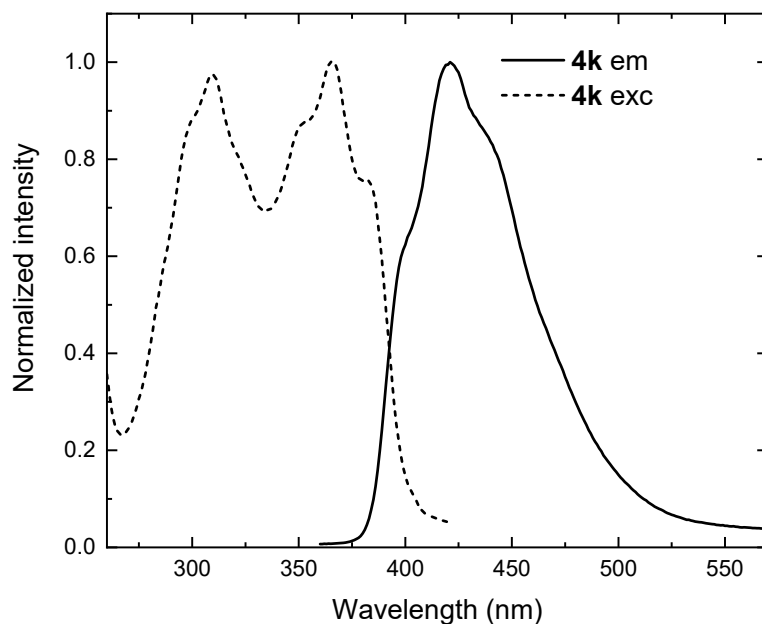

**Figure S15.** Excitation (dotted line) and emission (solid line) spectra of the ligand **4k** in dichloromethane.

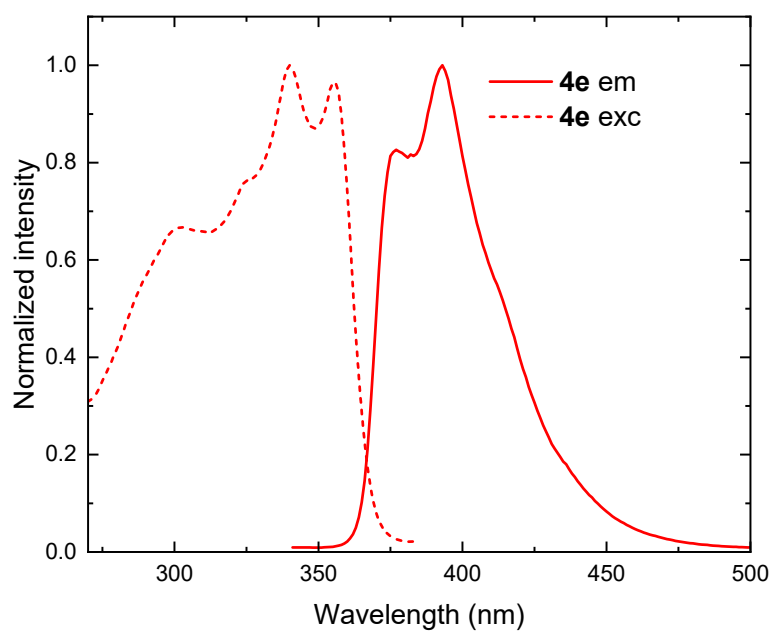

**Figure S16.** Excitation (dotted line) and emission (solid line) spectra of the ligand **4e** in dichloromethane.

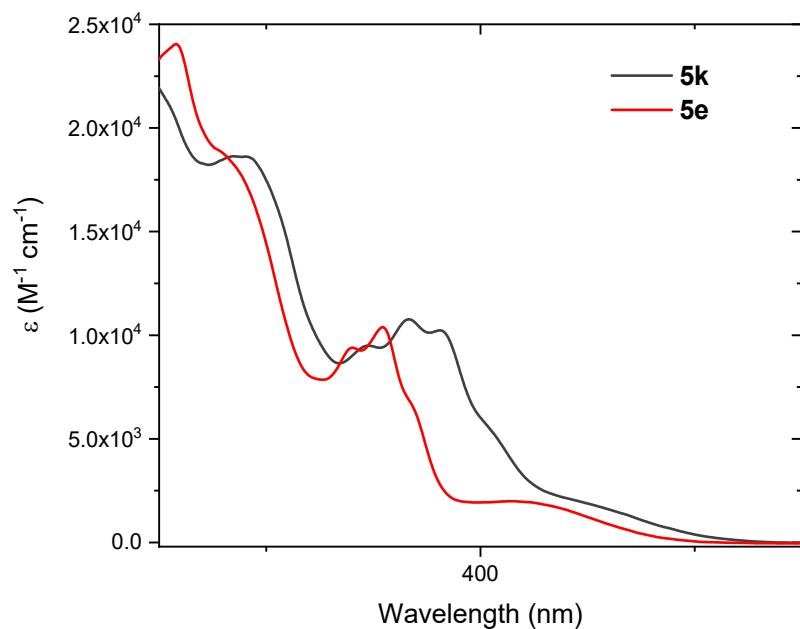

**Figure S17.** Absorption spectra of the Cu(I) complexes **5e** (red curve) and **5k** (black curve) in acetonitrile.

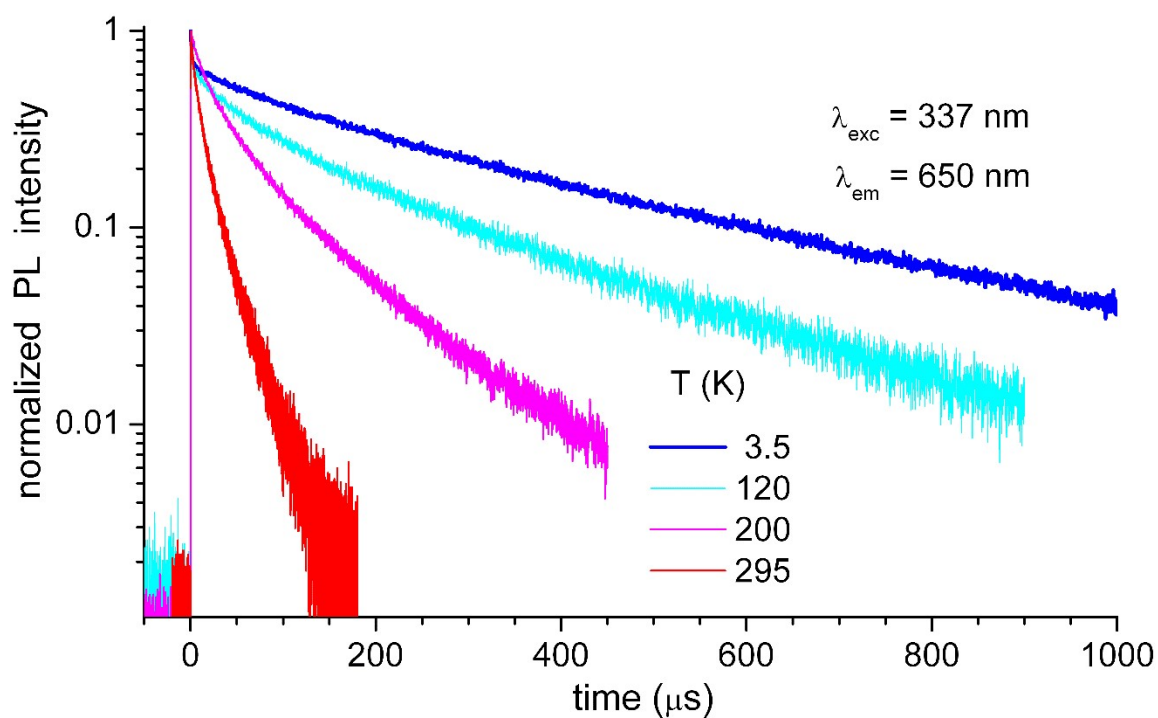

Figure S18. PL decay versus temperature of Cu(I) complex 5e.

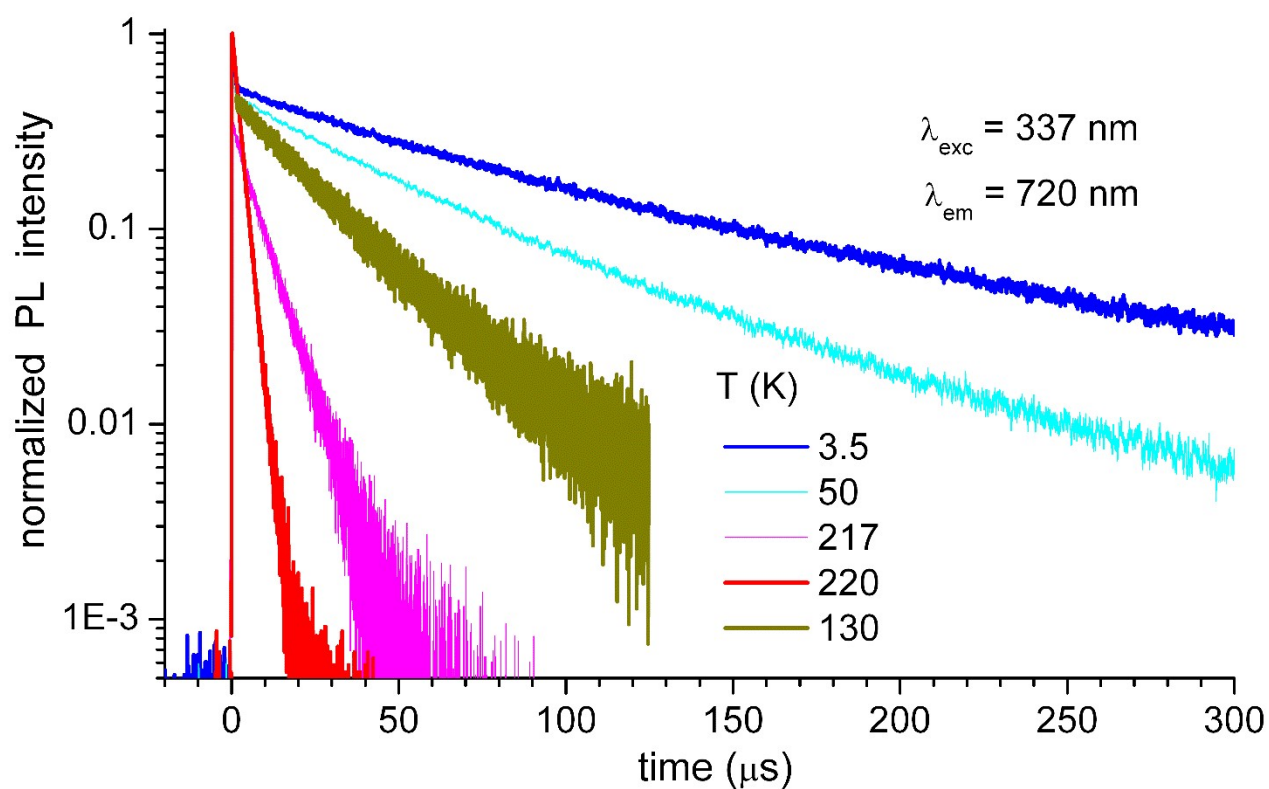

Figure S19. PL decay versus temperature of Cu(I) complex 5k.

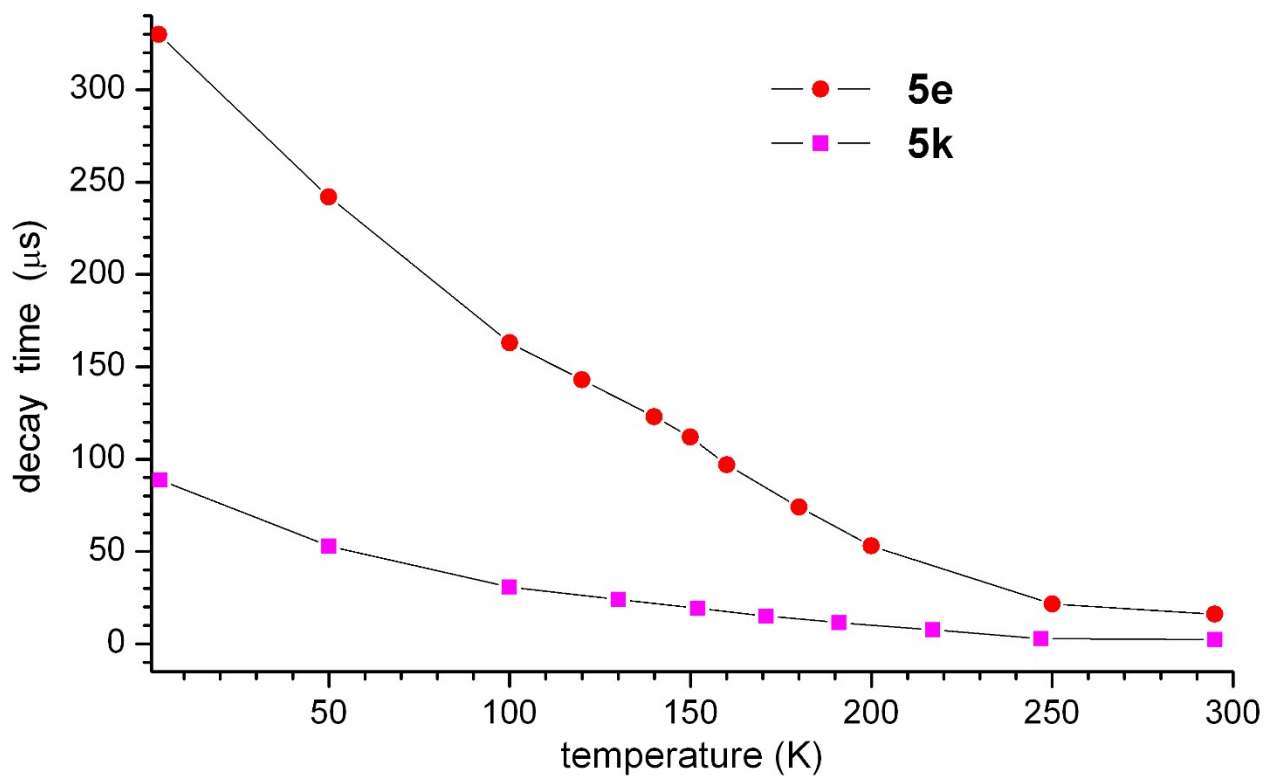

**Figure S20.** Decay time versus temperature of Cu(I) complexes **5k** (pink squares) and **5e** (red dots).

## 6. Additional quantum-chemical data

**Table S2.** Excitation energies and oscillator strengths of the five lowest singlet excitations of ligands **4k** and **4e**. The excitation with the largest oscillator strength,  $S_2$ , is a transition from the highest occupied molecular orbital (HOMO, H) to the lowest unoccupied molecular orbital (LUMO, L). The smaller excitation energy of **4k** compared to **4e** is connected to a smaller HOMO-LUMO gap, where the HOMO is shifted to higher energies and the LUMO is shifted to lower energies.

| <b>4k</b> |        |       | <b>4e</b>               |        |      |                       |                         |
|-----------|--------|-------|-------------------------|--------|------|-----------------------|-------------------------|
|           | E (eV) | f     | Dominant contribution   | E (eV) | f    | Dominant contribution |                         |
| $S_1$     | 3.85   | 0.007 |                         | $S_1$  | 4.01 | 0.001                 |                         |
| $S_2$     | 4.00   | 0.505 | 91.1% H $\rightarrow$ L | $S_2$  | 4.27 | 0.437                 | 78.0% H $\rightarrow$ L |
| $S_3$     | 4.59   | 0.207 |                         | $S_3$  | 4.62 | 0.140                 |                         |
| $S_4$     | 5.22   | 0.002 |                         | $S_4$  | 5.47 | 0.002                 |                         |
| $S_5$     | 5.52   | 0.050 |                         | $S_5$  | 5.53 | 0.000                 |                         |

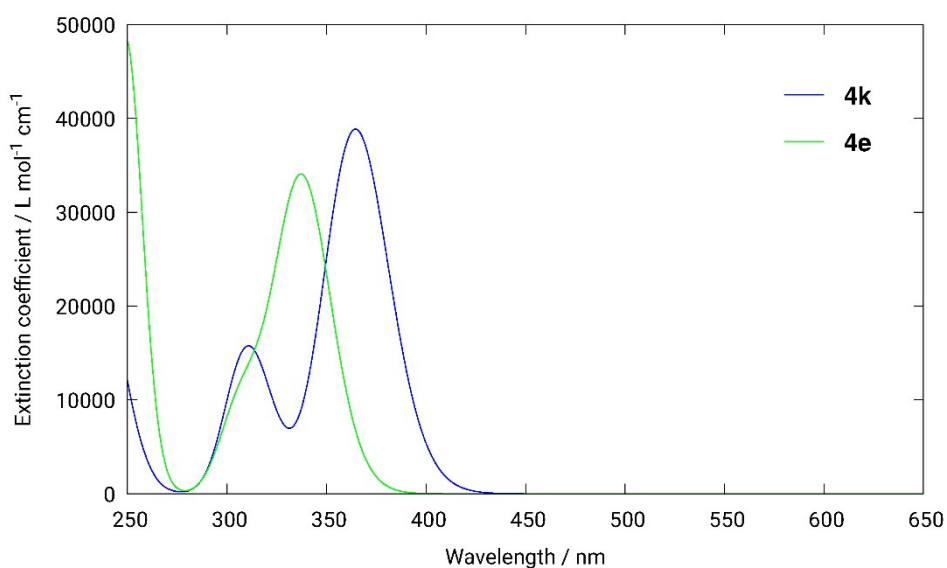

**Figure S21.** Simulated absorption spectra of **4k** and **4e**. For better comparison with experiment, the computed line spectra were broadened with Gaussian-shape functions (rms line width: 0.15 eV) and shifted to lower energies (by  $-0.6$  eV).

**Table S3.** Excitation energies and oscillator strengths of the five lowest singlet excitations of **5k** and **5e**. The lowest excitation,  $S_1$ , is a transition from the highest occupied molecular orbital (HOMO, H) to the lowest unoccupied molecular orbital (LUMO, L). This excitation corresponds to a metal-to-ligand charge transfer from Cu to the keto-amine or enol-imine ligand ( $^1MLCT$  state). The smaller excitation energy of **5k** compared to **5e** can be explained by the observation that the LUMO is shifted to lower energies in the corresponding ligand **4k**.

| <b>5k</b> |        |       | <b>5e</b>               |       |        |       |                         |
|-----------|--------|-------|-------------------------|-------|--------|-------|-------------------------|
|           | E (eV) | f     | Dominant contribution   |       | E (eV) | f     | Dominant contribution   |
| $S_1$     | 3.46   | 0.074 | 90.2% H $\rightarrow$ L | $S_1$ | 3.61   | 0.072 | 91.1% H $\rightarrow$ L |
| $S_2$     | 3.69   | 0.208 |                         | $S_2$ | 3.87   | 0.003 |                         |
| $S_3$     | 3.72   | 0.042 |                         | $S_3$ | 4.02   | 0.225 |                         |
| $S_4$     | 4.05   | 0.006 |                         | $S_4$ | 4.20   | 0.019 |                         |
| $S_5$     | 4.31   | 0.117 |                         | $S_5$ | 4.28   | 0.069 |                         |

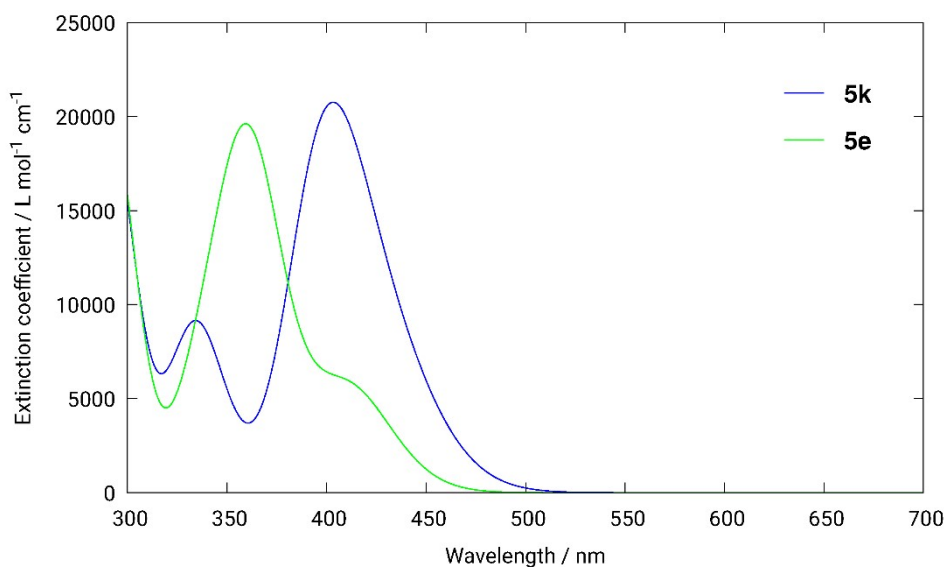

**Figure S22.** Simulated absorption spectra of **5k** and **5e**. For better comparison with experiment, the computed line spectra were broadened with Gaussian-shape functions (rms line width: 0.15 eV) and shifted to lower energies (by  $-0.6$  eV).

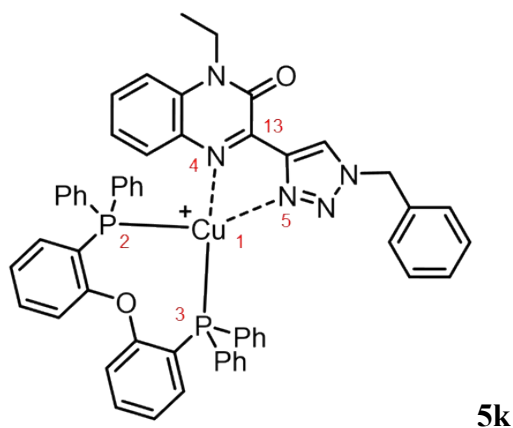

**Table S4.** Selected bond lengths and bond angles for the computed  $S_0$ ,  $^1\text{MLCT}$  and  $^3\text{MLCT}$  geometries and comparison with the x-ray structure.

| <b>5k</b>       | 1–2<br>(Å) | 1–3<br>(Å) | 1–4<br>(Å) | 1–5<br>(Å) | 2–1–3<br>(°) | 4–1–5<br>(°) |
|-----------------|------------|------------|------------|------------|--------------|--------------|
| X-ray           | 2.244      | 2.232      | 2.085      | 2.066      | 112.5        | 79.6         |
| $S_0$           | 2.312      | 2.295      | 2.165      | 2.106      | 116.3        | 78.1         |
| $^1\text{MLCT}$ | 2.346      | 2.413      | 2.043      | 2.072      | 106.4        | 82.1         |
| $^3\text{MLCT}$ | 2.342      | 2.360      | 1.981      | 2.083      | 106.1        | 82.3         |

**Table S5.** Change of selected bond lengths and bond angles for the computed  $S_0$ ,  $^1\text{MLCT}$  and  $^3\text{MLCT}$  geometries.

| <b>5k</b>                                 | 1–2<br>(pm) | 1–3<br>(pm) | 1–4<br>(pm) | 1–5<br>(pm) | 4–13<br>(pm) | 2–1–3<br>(°) | 4–1–5<br>(°) |
|-------------------------------------------|-------------|-------------|-------------|-------------|--------------|--------------|--------------|
| $S_0 \rightarrow ^1\text{MLCT}$           | +3.5        | +11.8       | -12.2       | -3.4        | +5.6         | -9.9         | +4.0         |
| $S_0 \rightarrow ^3\text{MLCT}$           | +3.0        | +6.6        | -18.4       | -2.3        | +7.4         | -10.2        | +4.2         |
| $^1\text{MLCT} \rightarrow ^3\text{MLCT}$ | -0.4        | -5.3        | -6.2        | +1.2        | +1.7         | -0.3         | +0.2         |

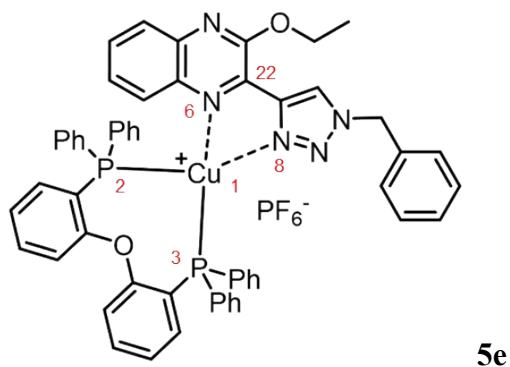

**Table S6.** Selected bond lengths and bond angles for the computed  $S_0$ ,  $^1\text{MLCT}$  and  $^3\text{MLCT}$  geometries and comparison with the x-ray structure.

| <b>5e</b>       | 1–2<br>(Å) | 1–3<br>(Å) | 1–6<br>(Å) | 1–8<br>(Å) | 2–1–3<br>(°) | 6–1–8<br>(°) |
|-----------------|------------|------------|------------|------------|--------------|--------------|
| X-ray           | 2.250      | 2.243      | 2.122      | 2.048      | 111.1        | 79.7         |
| $S_0$           | 2.296      | 2.312      | 2.152      | 2.108      | 116.2        | 78.1         |
| $^1\text{MLCT}$ | 2.365      | 2.418      | 2.048      | 2.048      | 104.2        | 81.7         |
| $^3\text{MLCT}$ | 2.362      | 2.378      | 1.984      | 2.052      | 104.9        | 81.9         |

**Table S7.** Change of selected bond lengths and bond angles for the computed  $S_0$ ,  $^1\text{MLCT}$  and  $^3\text{MLCT}$  geometries.

| <b>5e</b>                                 | 1–2<br>(pm) | 1–3<br>(pm) | 1–6<br>(pm) | 1–8<br>(pm) | 6–22<br>(pm) | 2–1–3<br>(°) | 6–1–8<br>(°) |
|-------------------------------------------|-------------|-------------|-------------|-------------|--------------|--------------|--------------|
| $S_0 \rightarrow ^1\text{MLCT}$           | +7.0        | +10.6       | -10.5       | -6.0        | +5.4         | -12.1        | +3.6         |
| $S_0 \rightarrow ^3\text{MLCT}$           | +6.6        | +6.6        | -16.8       | -5.7        | +6.4         | -11.4        | +3.8         |
| $^1\text{MLCT} \rightarrow ^3\text{MLCT}$ | -0.3        | -4.0        | -6.3        | +0.3        | +1.0         | -0.7         | -0.2         |

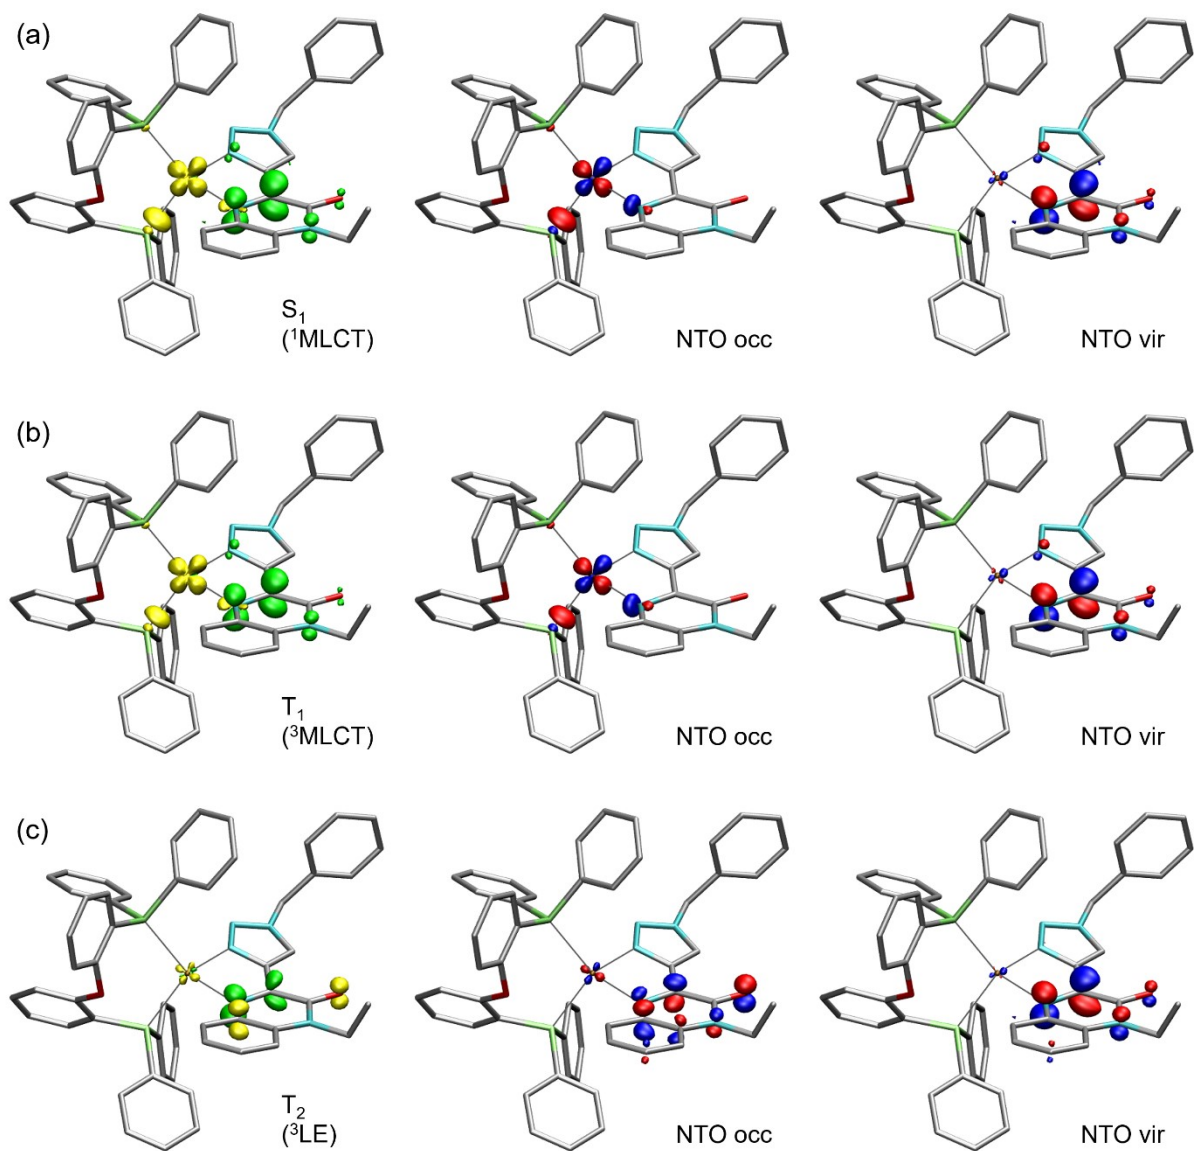

**Figure S23.** Difference between the electron density of the ground state and the excited states (a)  $S_1$ , (b)  $T_1$  and (c)  $T_2$  of complex **5k** at the optimized  $^1\text{MLCT}$  geometry (isovalue  $\pm 0.01 \text{ bohr}^{-3}$ ). Electron density is transferred from yellow to green regions. The corresponding pair of natural transition orbitals that describes the electron (NTO occ) and the hole (NTO vir) is also given (isovalue  $\pm 0.1 \text{ bohr}^{-3/2}$ ). Hydrogen atoms are omitted for clarity.

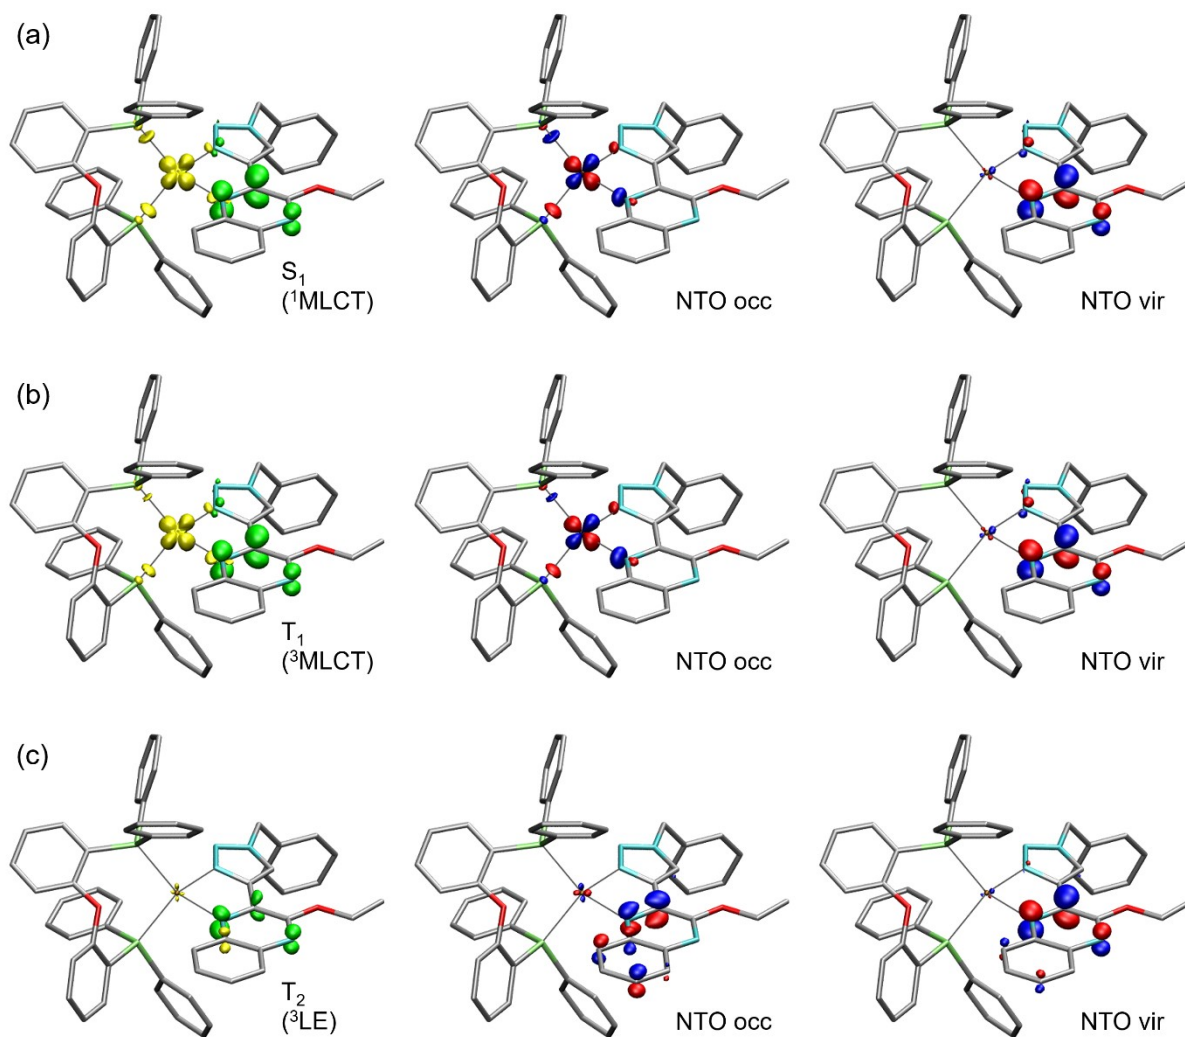

**Figure S24.** Difference between the electron density of the ground state and the excited states (a)  $S_1$ , (b)  $T_1$  and (c)  $T_2$  of complex **5e** at the optimized  $^1\text{MLCT}$  geometry ((isovalue  $\pm 0.01$  bohr $^{-3}$ ). Electron density is transferred from yellow to green regions. The corresponding pair of natural transition orbitals that describes the electron (NTO occ) and the hole (NTO vir) is also given (isovalue  $\pm 0.1$  bohr $^{-3/2}$ ). Hydrogen atoms are omitted for clarity.

**Table S8.** Values of the quantity  $\Lambda$  used to measure the degree of spatial overlap between the pair of natural transition orbitals that describes the electron (NTO occ) and the hole (NTO vir) involved in the respective excitation.

| <b>5k</b>      |                |          | <b>5e</b>                  |                |                |          |                            |
|----------------|----------------|----------|----------------------------|----------------|----------------|----------|----------------------------|
|                | S <sub>0</sub> | geometry | <sup>1</sup> MLCT geometry |                | S <sub>0</sub> | geometry | <sup>1</sup> MLCT geometry |
| S <sub>1</sub> |                | 0.32     | 0.36                       | S <sub>1</sub> |                | 0.35     | 0.35                       |
| T <sub>1</sub> |                | –        | 0.47                       | T <sub>1</sub> |                | –        | 0.39                       |
| T <sub>2</sub> |                | –        | 0.82                       | T <sub>2</sub> |                | –        | 0.85                       |

**Table S9.** Estimated singlet-triplet energy gaps for the CT states using different approximations. All values are given in eV.

|                         | <b>5k</b> | <b>5e</b> |
|-------------------------|-----------|-----------|
| $\Delta E(S_1-T_1)@S_0$ | 0.21      | 0.10      |
| $\Delta E(S_1-T_1)@S_1$ | 0.15      | 0.14      |
| $\Delta E(S_1-T_1)@T_1$ | 0.41      | 0.28      |
| $E(S_1)@S_1-E(T_1)@T_1$ | 0.37      | 0.26      |
| $\Delta E$ exp          | 0.11      | 0.05      |

## 7. Electrochemical data of the ligands

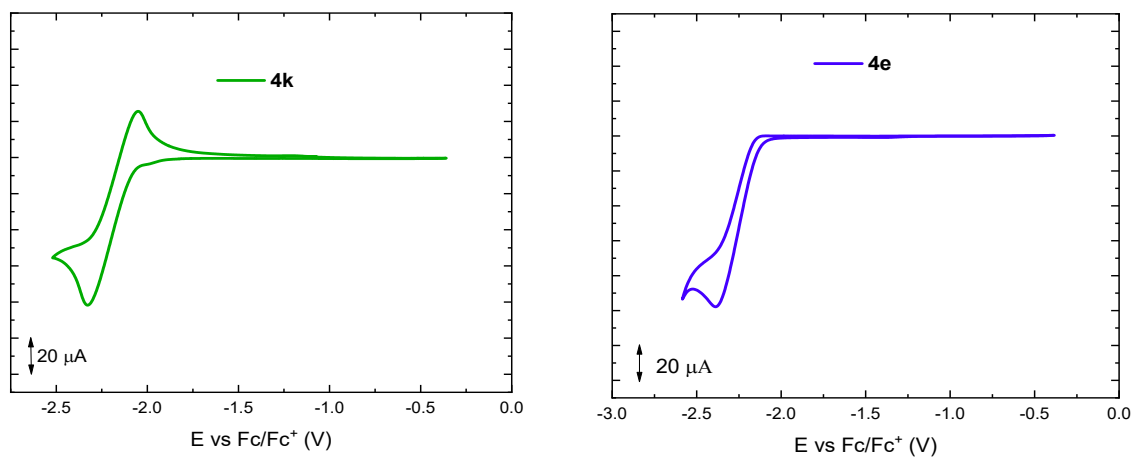

**Figure S25.** Cyclic voltammetry of the ligands **4k** (left, green curve) and **4e** (right, blue curve) in a 0.1M TBAPF<sub>6</sub> solution in dichloromethane. Scan rate 100 mV/s.

## 8. Additional photocurrent measurements

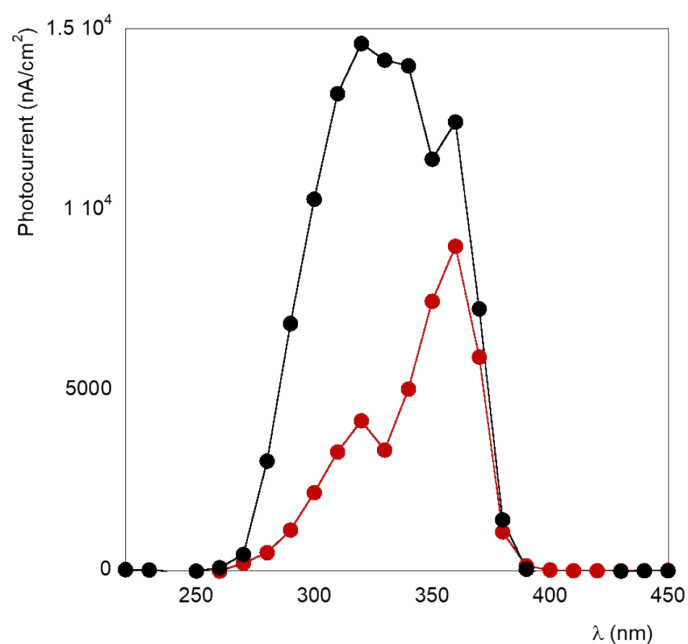

**Figure S26.** Photocurrent action spectra of film **5k** (black) and **5e** (red) on TiO<sub>2</sub>/FTO electrodes. The measurements have been performed in aqueous TEOA solution, at 0 V (vs. Ag/AgCl), upon photoirradiation at different wavelengths (every 10 nm from 200 to 600 nm).

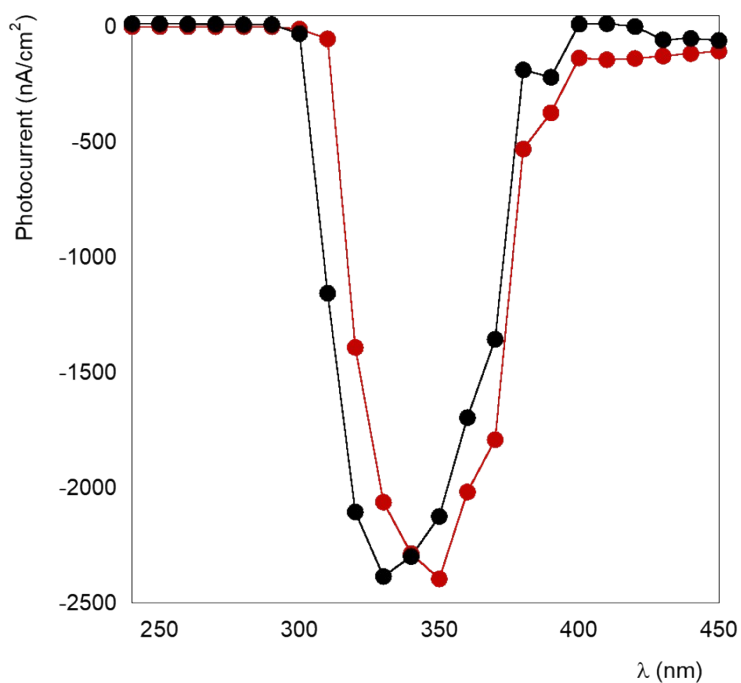

**Figure S27.** Photocurrent action spectra of film **5k** (black) and **5e** (red) on TiO<sub>2</sub>/FTO electrodes. The measurements have been performed in aqueous methylviologen solution, at 0 V (vs. Ag/AgCl), upon photoirradiation at different wavelengths (every 10 nm from 200 to 600 nm).

## 9. References

- [1] O.V. Dolomanov, L.J. Bourhis, R.J. Gildea, J.A.K. Howard, H. Puschmann, *J. Appl. Cryst.* **2009**, *42*, 339–341.
- [2] G.M. Sheldrick, *Acta Cryst. A* **2015**, *A71*, 3–8.
- [3] G.M. Sheldrick, *Acta Cryst. C* **2015**, *C71*, 3–8.
